# Supplementary material for: Single Nucleotide Polymorphisms of Immunity-Related Genes and Their Effects on Immunophenotypes in Different Pig Breeds
Source: MDPI journal article supplement (doi:10.3390/genes12091377), 2021-08-31
Supplement: s1 [file s1]

Supplementary Table I. Summary of primer sequences used for ARMS-PCR in discovering SNPs in cytokine, chemokine and toll-like receptor immune-related genes.

| Primers | SNPs Genetic Locus   | Accession No. | Phenotype | Sequence (from 5' to 3')                                                                                                                                                                         | Source   |
|---------|----------------------|---------------|-----------|--------------------------------------------------------------------------------------------------------------------------------------------------------------------------------------------------|----------|
| SNP 1   | IFN- $\alpha$ (-235) | X57191        | Promoter  | F: ACCTCATGGTTCTAGTCGTATTC<br>R(A): TCTTTTTCATTATTGCCTTCCGTT<br>R(G): TCTTTTTCATTATTGCCTTCCGTC<br>F(C): AGCATAGTATGGGTATAAATCGTC<br>F(T): AGCATAGTATGGGTATAAATCGTT<br>R: TTCTATTACCTCTACCTATGTCC | Designed |
| SNP 2   | IFN- $\gamma$ (382)  | X53085        | Intron 1  | F: TCAGCTTTGCGTGACTTTG<br>R: TTCTATTACCTCTACCTATGTCC                                                                                                                                             | Designed |
| SNP 3   | IFN- $\gamma$ (490)  | X53085        | Intron 1  | F: TCTGCTACTGCACCTTCGAGG<br>R: CTATCTTTCTACCACACCCT                                                                                                                                              | Designed |
| SNP 4   | TNF- $\alpha$ (366)  | NC_010449     | Intron 1  | F(T): GGACTTATTCAAATCTAATTAATCCTT<br>F(C): GGACTTATTCAAATCTAATTAATCCTC<br>R: AATTTCCTTCTTCTCTCCAC                                                                                                | Designed |
| SNP 5   | TNF- $\alpha$ (755)  | NC_010449     | Intron 1  | F: AAGCTAGAGAAGCAGGTGGCTG<br>R(A): ATCCCATCTGTCCATGAGGTTCT<br>R(G): ATCCCATCTGTCCATGAGGTTCC                                                                                                      | Designed |
| SNP 6   | TNF- $\alpha$ (1219) | NC_010449     | Intron 3  | F: TGTGGATGCCATCAAAGAAGC<br>R: AGTGCTGCTCATAGTCTTGG                                                                                                                                              | Designed |
| SNP 7   | GM-CSF (193)         | U67318        | Intron 1  | F: TGTGGATGCCATCAAAGAAGC<br>R: ATCCCTGGTGACTCTCTGG                                                                                                                                               | Designed |
| SNP 8   | GM-CSF (245)         | U67318        | Intron 1  | F(C): AAGGAGAGTAAGTGCCTTTCC<br>F(G): AAGGAGAGTAAGTGCCTTTCCG<br>R: AGTGCTGCTCATAGTCTTGG                                                                                                           | Designed |
| SNP 9   | GM-CSF (741)         | U67318        | Intron 1  | F: TGTGGATGCCATCAAAGAAGC<br>R: AGTGCTGCTCATAGTCTTGG                                                                                                                                              | Designed |
| SNP 10  | GM-CSF (753)         | U67318        | Intron 1  | F: TGTGGATGCCATCAAAGAAGC<br>R: AGTGCTGCTCATAGTCTTGG                                                                                                                                              | Designed |
| SNP 11  | GM-CSF (782)         | U67318        | Intron 1  | F: TGGGCAGTCCTAGCATTCAG<br>R: TCATTTCTTCCTGTCTCATCC                                                                                                                                              | Designed |
| SNP 12  | MCP-1 (273)          | CU928660      | Intron 1  | F: ACTGCAGCCACCTTCTG<br>R(T): GCTGGGGTCTGGGAA<br>R(C): GCTGGGGTCTGGGAG                                                                                                                           | Designed |
| SNP 13  | MCP-1 (336)          | CU928660      | Intron 1  | F: TTAAGTGCACGATCAGGAA<br>R: ACTGCCTAACTTCTGGGAGAG                                                                                                                                               | Designed |
| SNP 14  | MCP-1 (351)          | CU928660      | Intron 1  | F: TTAAGTGCACGATCAGGAA<br>R: ACTGCCTAACTTCTGGGAGAG                                                                                                                                               | Designed |
| SNP 15  | MCP-1 (360)          | CU928660      | Intron 1  | F: TTAAGTGCACGATCAGGAA<br>R: ACTGCCTAACTTCTGGGAGAG                                                                                                                                               | Designed |
| SNP 16  | MCP-1 (383)          | CU928660      | Intron 1  | F: TTAAGTGCACGATCAGGAA<br>R: ACTGCCTAACTTCTGGGAGAG                                                                                                                                               | Designed |
| SNP 17  | TLR 3 (95)           | NC_010457     | Exon 3    | F(A): ACCAACAAATGTACTGTTC<br>F(G): ACCAACAAATGTACTGTTCG<br>R: TCCTCTTACCAAGATAAAAG                                                                                                               | Designed |
| SNP 18  | TLR 3 (159)          | NC_010457     | Exon 3    | F(C): GACCTCCCGCAAAC<br>F(T): GACCTCCCGCAAAT<br>R: TCCTCTTACCAAGATAAAAG                                                                                                                          | Designed |
| SNP 19  | TLR 3 (405)          | NC_010457     | Exon 3    | F(A): TCCATCTAATGTCCAACCTCA<br>F(T): TCCATCTAATGTCCAACCTCT<br>R: TCCTCTTACCAAGATAAAAG                                                                                                            | Designed |
| SNP 20  | TLR 3 (800)          | NC_010457     | Exon 3    | F(C): TTCATGAACAGCAACATTCC<br>F(T): TTCATGAACAGCAACATTCT<br>R: TCCTCTTACCAAGATAAAAG                                                                                                              | Designed |
| SNP 21  | TLR 4 (-13)          | AY753179      | Promoter  | F: TGGAAAGCCACCGTCC<br>R (A): GAATCATCCTGGCATTTGCT<br>R (G): GAATCATCCTGGCATTTGCC                                                                                                                | Designed |
| SNP 22  | TLR 7 (-332)         | AB291813      | Intron 1  | F(A): TTTTGAGAATCTAAAGCGA<br>F(G): TTTTGAGAATCTAAAGCGG<br>R: TCAAAACAGAGAAGCCTGG                                                                                                                 | Designed |
| SNP 23  | TLR 7 (66)           | AB291813      | Intron 1  | F(C): TTGAGGAAGAAGCTGAAACC<br>F(T): TTGAGGAAGAAGCTGAAACT<br>R: TAGTAATTTTCCATCCACTGA                                                                                                             | Designed |
| SNP 24  | TLR 7 (357)          | AB291813      | Intron 1  | F(A): GTGCTTTTCTAGTGTAGGA<br>F(G): GTGCTTTTCTAGTGTAGGG<br>R: TAGTAATTTTCCATCCACTGA                                                                                                               | Designed |
| SNP 25  | TLR 7 (1413)         | AB291813      | Intron 1  | F(C): GTTGTGCTAAAGACTGGATGCTCTC<br>F(T): GTTGTGCTAAAGACTGGATGCTCT<br>R: TGCACCAAGGCACATGGA                                                                                                       | Designed |
| SNP 26  | TLR 7 (1633)         | AB291813      | Intron 1  | F(C): AAGTTGGGATATCTTTTTTAAC<br>F(T): AAGTTGGGATATCTTTTTTAAT<br>R: TGCACCAAGGCACATGGA                                                                                                            | Designed |
| SNP 27  | TLR 7 (2034)         | AB291813      | Intron 1  | F(A): GATGTGGGAAGTCCACTTCAAA<br>F(G): GATGTGGGAAGTCCACTCAAG<br>R: ATATAGCAGGATCTCATGCTTATC                                                                                                       | Designed |
| SNP 28  | TLR 7 (22996)        | AB291813      | Exon 3    | F(A): TAAATTTTGCATCTTCTCA<br>F(C): TAAATTTTGCATCTTCTCC<br>R: AAGGAGGAAGAAGGCTC                                                                                                                   | Designed |
| SNP 29  | TLR 8 (14)           | AB291813      | Exon 1    | F(T): GAAAACATGACCTTCACAT<br>F(G): GAAAACATGACCTTCACAG<br>R: CGCTTAGATCCAGTACTCTTA                                                                                                               | Designed |
| SNP 30  | TLR 8 (41)           | AB291813      | Exon 1    | F(T): CTGACCTGCCTTTTCTGCT<br>F(G): CTGACCTGCCTTTTCTGCG<br>R: GGAAATATTAATGTACTGGGGATA                                                                                                            | Designed |
| SNP 31  | TLR 8 (124)          | AB291813      | Exon 1    | F(C): AGAAAAGAAAATGGCTCTC<br>F(G): AGAAAAGAAAATGGCTCTG<br>R: CGCTTAGATCCAGTACTCTTA                                                                                                               | Designed |
| SNP 32  | TLR 8 (176)          | AB291813      | Exon 1    | F(A): GAAGTACCCCGAAGAGTGTA<br>F(G): GAAGTACCCCGAAGAGTGTA<br>R: CGCTTAGATCCAGTACTCTTA                                                                                                             | Designed |
| SNP 33  | TLR 8 (265)          | AB291813      | Exon 1    | F(A): GGGCTGCAAAATCTGACTAAAA<br>F(G): GGGCTGCAAAATCTGACTAAAG<br>R: GGAAATATTAATGTACTGGGGATA                                                                                                      | Designed |
| SNP 34  | TLR 8 (534)          | AB291813      | Exon 1    | F(A): TGGAACTGCTATTTTACTTGAATGAA<br>F(C): TGGAACTGCTATTTTACTTGAATGAC<br>R: CAAATGATGCAGATCTCAAAACCA                                                                                              | Designed |
| SNP 35  | TLR 8 (570)          | AB291813      | Exon 1    | F(A): ATAGACGAGGGAGCATTGAAAATTTA<br>F(T): ATAGACGAGGGAGCATTGAAAATTT<br>R: TGCAGCACCTTCAAATGATGCAGA                                                                                               | Designed |
| SNP 36  | TLR 9 (872)          | CU915558      | Intron 1  | F(A): GGTGGAGTTGTGGCCATGTA<br>F(G): GGTGGAGTTGTGGCCATGTG<br>R: GCACCTCCGTGAGATTGTTGTA                                                                                                            | Designed |
| SNP 37  | TLR 9 (905)          | CU915558      | Intron 1  | F: TCAATGAACGCTCTAGGT<br>R: TGTAGCTCAGGTTACGCTC                                                                                                                                                  | Designed |
| SNP 38  | TLR 9 (1126)         | CU915558      | Intron 1  | F: TCAATGAACGCTCTAGGT<br>R(A): CGAAGTCGGAGTCGT<br>R(G): CGAAGTCGGAGTCGC                                                                                                                          | Designed |
| SNP 39  | TLR 9 (1186)         | CU915558      | Intron 1  | F(C): AACCTCAAGTGGAACTGCC<br>F(T): AACCTCAAGTGGAACTGCCT<br>R: GCACCTCCGTGAGATTGTTGTA                                                                                                             | Designed |
